# Supplementary material
Source: PubMed Central journal article supplement (PMC4716736)
Supplement: NIHMS635663-supplement-2.pdf [file NIHMS635663-supplement-2.pdf]

**Supplementary Table 1:** Progeny from NS mutant breeding

|                                       | WT  | Heterozygote | Litter size<br>(Average $\pm$ SEM) |
|---------------------------------------|-----|--------------|------------------------------------|
| <i>Ptpn11</i> <sup>D61G/+</sup> x WT  | 158 | 71           | 4.3 $\pm$ 0.2                      |
| <i>Ptpn11</i> <sup>N308D/+</sup> x WT | 501 | 181          | 5.7 $\pm$ 0.2                      |
